# Supplementary material for: Cameroonian Spice Extracts Modulate Molecular Mechanisms Relevant to Cardiometabolic Diseases in SW 872 Human Liposarcoma Cells
Source: MDPI journal article supplement (doi:10.3390/nu13124271), 2021-11-26
Supplement: s1 [file s1]

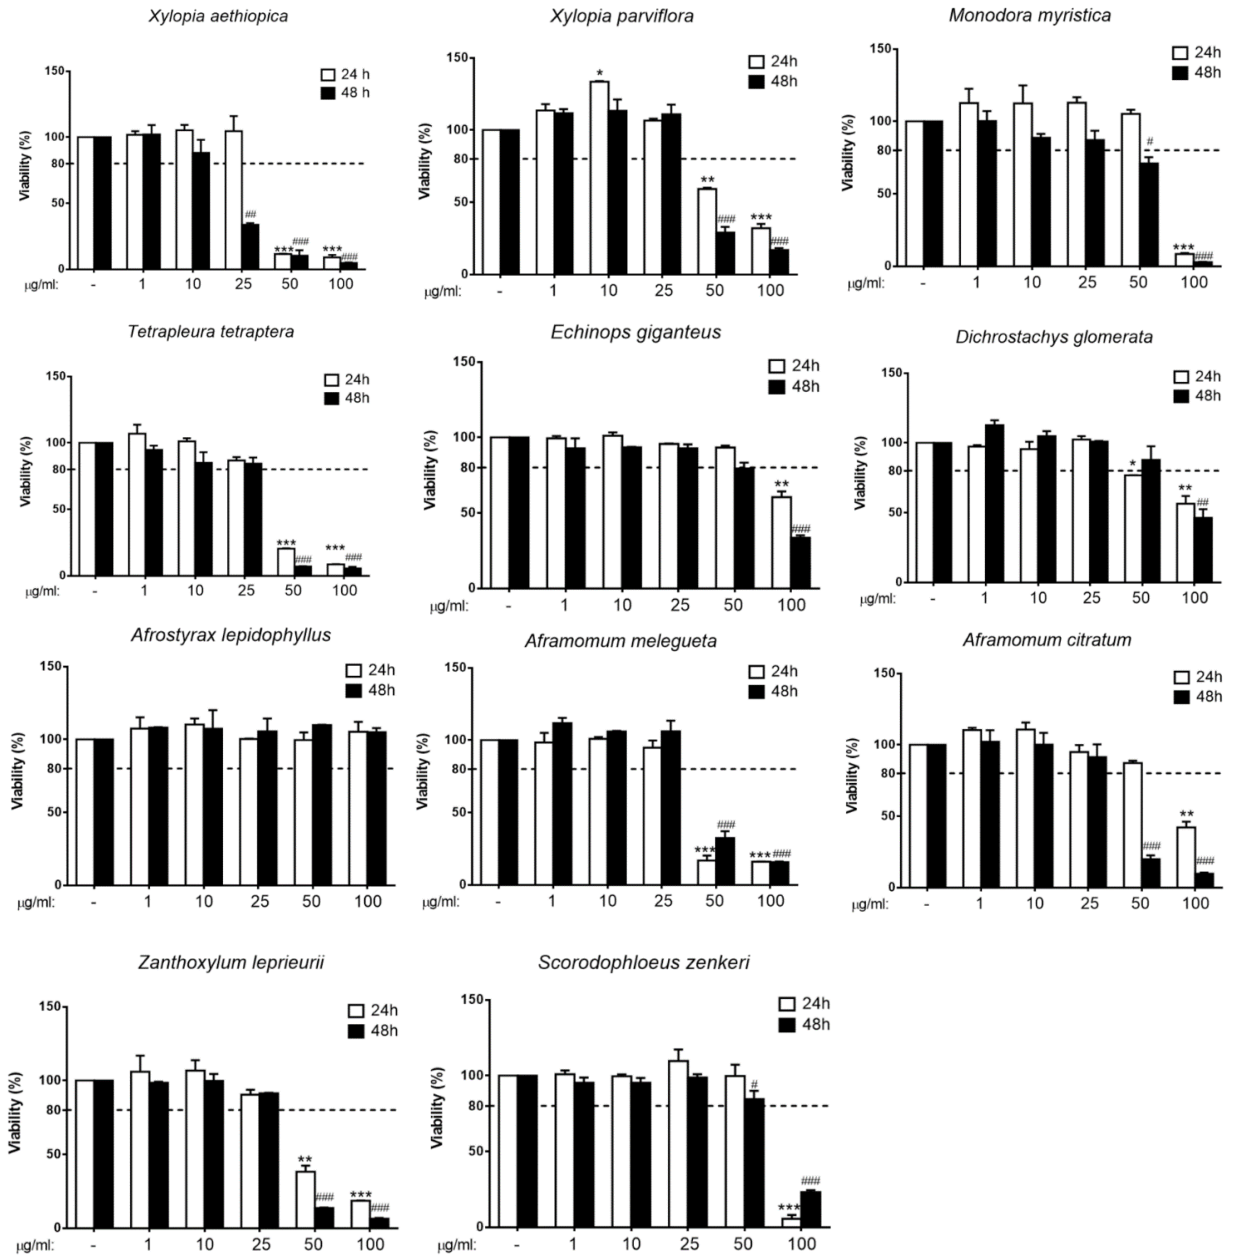

**Supplementary Figure S1.** SW 872 cells viability (MTS assay) after treatment with all extracts. Cells were incubated for 24 h and 48 h with increasing concentrations (1 - 100 µg/mL) of each extract. Data are expressed as % of control taken as 100; mean±SD, N=3. The dotted line set at 80% indicates the threshold above which cells are considered viable. \*  $p < 0.05$ , \*\*  $p < 0.01$ , \*\*\*  $p < 0.001$  vs. the control group of 24 h incubation; #  $p < 0.05$ , ##  $p < 0.01$  and ###  $p < 0.001$  vs. the control group of 48 h of incubation.

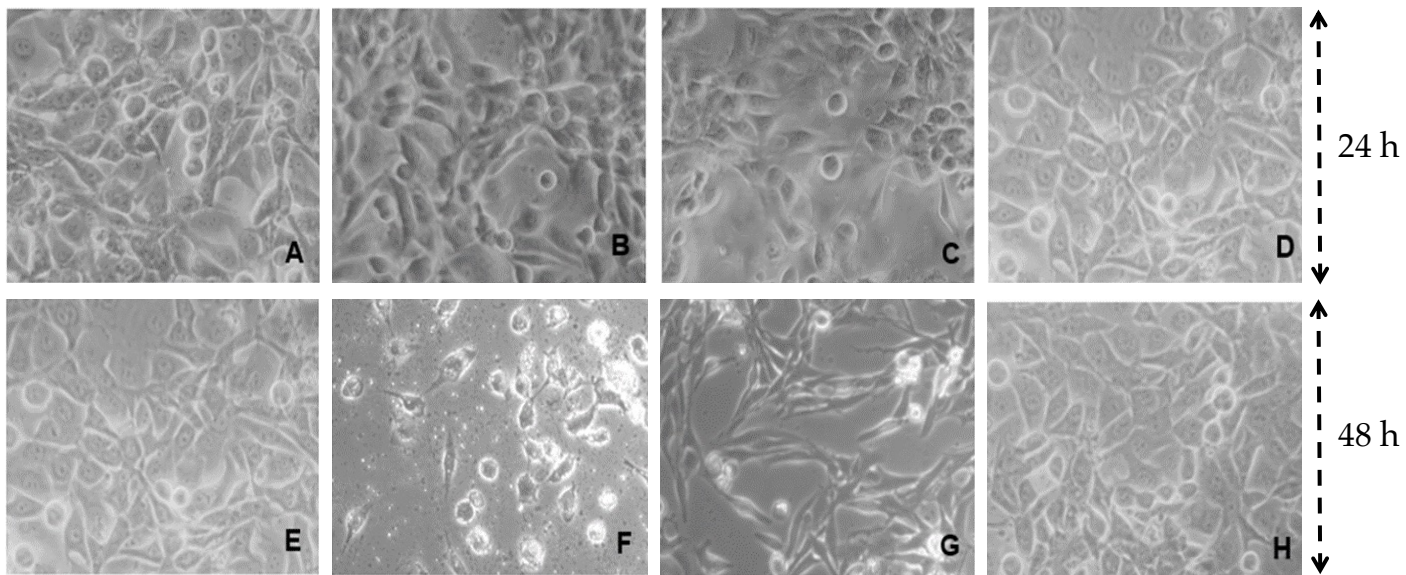

**Supplementary Figure S2.** Morphological analysis of differentiated SW 872 cells treated with spice extracts. (A) control cells, incubation: 24 h; (B) treatment with 10  $\mu\text{g/mL}$  *Xylopi aetiopica*, 24 h; (C) treatment with 20  $\mu\text{g/mL}$  *Xylopi aetiopica*, 24 h; (D) treatment with 10  $\mu\text{g/mL}$  *Afrostryax lepidophyllus*, 24 h; (E) control cells, incubation: 48 h; (F) treatment with 100  $\mu\text{g/mL}$  *Xylopi aetiopica*, 48 h; (G) treatment with 100  $\mu\text{g/mL}$  *Afrostryax lepidophyllus*, 48 h; (H) treatment with 20  $\mu\text{g/mL}$  *Afrostryax lepidophyllus*, 24 h. Images were obtained using a light microscope at 20 X magnification. Effect of spice extracts on triglyceride accumulation in differentiated SW 872 cells.

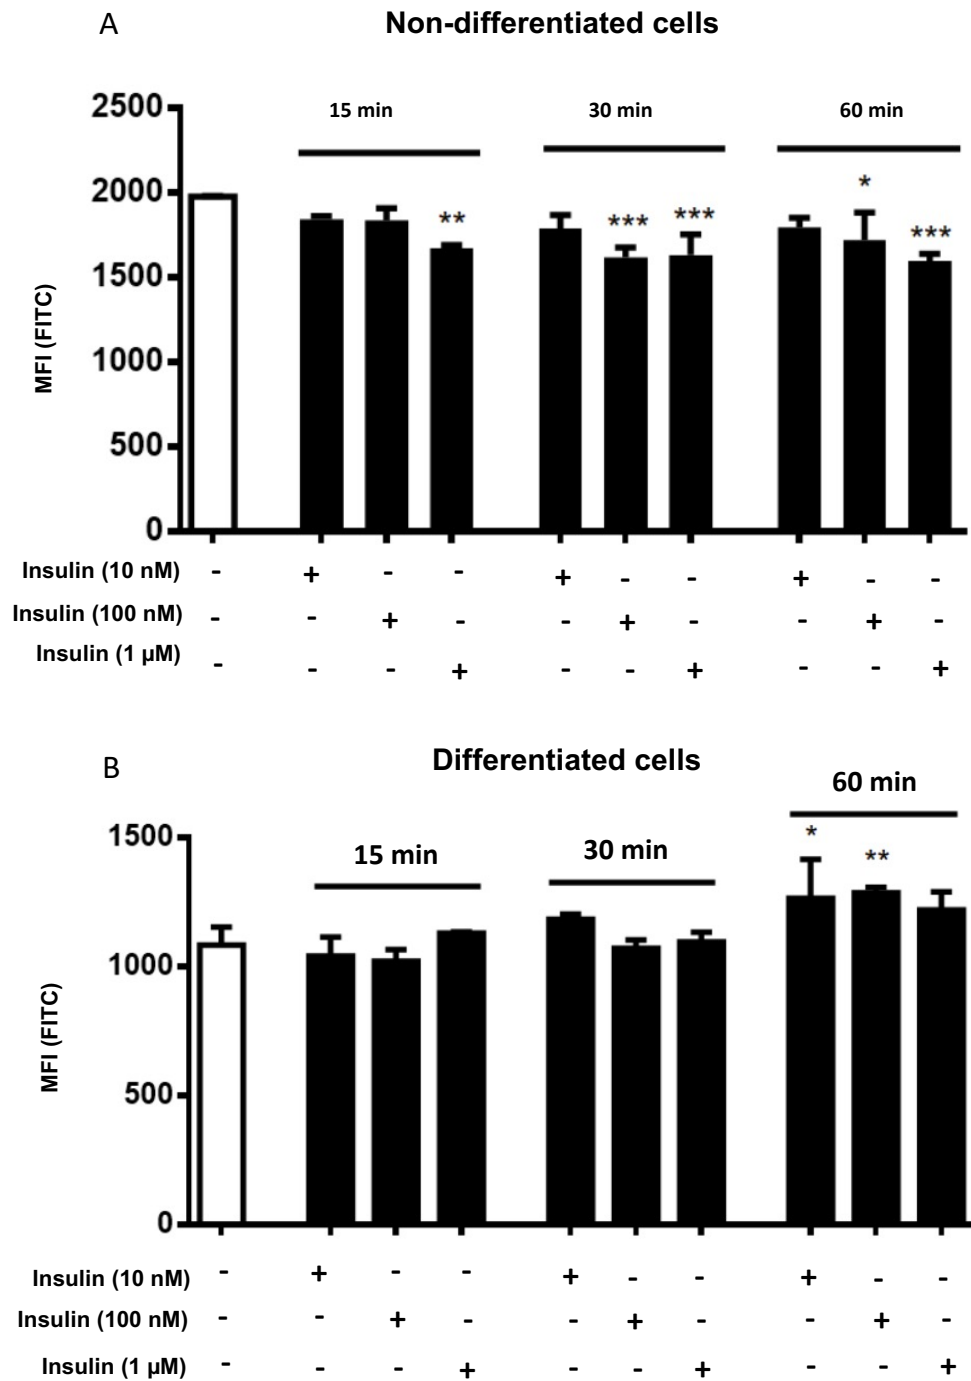

**Supplementary Figure S3.** Glucose uptake in SW 872 cells. Time-course (15-60 min) and dose-response to insulin (10 nM-1 μM) of glucose uptake in non-differentiated (A) and differentiated (B) cells. Glucose uptake was assessed by FACS analysis. One experiment (n=3) is shown, representative of 3 separated experiments, each in triplicate. Results are expressed as mean±SD. \* p < 0.05, \*\*p < 0.01, \*\*\* p < 0.001 (one-way ANOVA multiple comparison).
